# Supplementary material
Source: publisher site journal article supplement (https://www.spandidos-publications.com/7386/downloadSupplementary)
Supplement: Supplementary file 1 [file downloadSupplementary]

## Sheet: Table S1 HL gene panel
Table SI. A total of 130 hearing loss genes.
ACMG HL gene	Number of panels included	Disease association	Inheritance Pattern	Genetic evidence	Experimental evidence	Total points	Final Interpretation	ACMG HL gene	Number of panels included	Disease association	Inheritance Pattern	Genetic evidence	Experimental evidence	Total points	Final Interpretation
ABHD12	6	PHARC syndrome	AR	12	6	18	Definitive
ACTG1	13	Baraitser-Winter syndrome	AD	12	0	12	Definitive	ACTG1	13	Nonsyndromic hearing loss	AD	12	1	13	Definitive
ADGRV1	14	Usher syndrome type 2	AR	12	5	17	Definitive
AIFM1	1	Auditory neuropathy spectrum	X-linked	12	2.5	14.5	Definitive
ATP6V1B1	12	Renal tubular acidosis with deafness	AR	12	2	14	Definitive
BCS1L	5	Bjornstad Syndrome	AR	12	3	15	Definitive
BSND	13	Bartter Syndrome	AR	12	5	17	Definitive
CDH23	16	Usher syndrome type 1	AR	12	6	18	Definitive	CDH23	16	Nonsyndromic hearing loss	AR	9	4.5	13.5	Definitive
CHD7	6	CHARGE syndrome	AD	12	6	18	Definitive
CIB2	12	Nonsyndromic hearing loss	AR	11	6	17	Definitive
CLDN14	16	Nonsyndromic hearing loss	AR	11.5	3	14.5	Definitive
CLPP	4	Perrault syndrome	AR	12	2	14	Definitive
CLRN1	14	Usher syndrome type 3	AR	12	6	18	Definitive
COCH	14	Nonsyndromic hearing loss	AD	10	3.5	13.5	Definitive
COL11A2	15	Otospondylomegaepiphyseal dysplasia A	AD	12	0	12	Definitive	COL11A2	15	Otospondylomegaepiphyseal dysplasia B	AR	12	3.5	15.5	Definitive
DIAPH1	15	Hearing loss and macrothrombocytopenia	AD	10	6	16	Definitive
DNMT1	3	DNMT1 methylopathy	AD	12	4	16	Definitive
DSPP	9	Dentinogenesis imperfecta	AD	12	3	15	Definitive
ESPN	13	Nonsyndromic hearing loss	AR	8.5	5.5	14	Definitive	ESPN	13	Nonsyndromic hearing loss	AD	0.75	0.5	1.25	Limited
ESRRB	16	Nonsyndromic hearing loss	AR	12	3	15	Definitive
EYA1	11	Branchio-oto-renal syndrome	AD	12	6	18	Definitive
EYA4	15	Nonsyndromic hearing loss	AD	12	2	14	Definitive
GIPC3	15	Nonsyndromic hearing loss	AR	12	5	17	Definitive
GJB2	17	Nonsyndromic hearing loss	AR	12	6	18	Definitive	GJB2	17	Syndromic hearing loss	AD	12	6	18	Definitive
GJB6	17	Hidrotic ectodermal dysplasia	AD	8.5	2	10.5	Definitive	GJB6	17	Nonsyndromic hearing loss	AR	0	0	0	Refuted
GPSM2	16	Chudley-McCullough syndrome	AR	12	4.5	16.5	Definitive
GRXCR1	15	Nonsyndromic hearing loss	AR	12	5	17	Definitive
GSDME	3	Nonsyndromic hearing loss	AD	11	5.5	16.5	Definitive
HSD17B4	8	Perrault syndrome	AR	12	0.5	12.5	Definitive
ILDR1	15	Nonsyndromic hearing loss	AR	12	6	18	Definitive
KCNQ1	11	Jervell and Lange-Nielsen syndrome	AR	12	6	18	Definitive
KCNQ4	15	Nonsyndromic hearing loss	AD	12	5.5	17.5	Definitive
LHFPL5	16	Nonsyndromic hearing loss	AR	9.5	5	14.5	Definitive
LOXHD1	15	Nonsyndromic hearing loss	AR	12	2.5	14.5	Definitive
LRTOMT	15	Nonsyndromic hearing loss	AR	12	3	15	Definitive
MARVELD2	16	Nonsyndromic hearing loss	AR	12	5.5	17.5	Definitive
MITF	10	Waardenburg syndrome	AD	11.5	6	17.5	Definitive
MT-RNR1	5	Mitochondrial nonsyndromic sensorineural deafness with susceptibility to aminoglycoside exposure	Mitochondrial	12	2	14	Definitive
MT-TS1	5	Mitochondrial Nonsyndromic sensorineural deafness	Mitochondrial	9	2	11	Definitive
MYH9	15	MYH9 related disease	AD	12	6	18	Definitive
MYO15A	16	Nonsyndromic hearing loss	AR	12	6	18	Definitive
MYO6	17	Nonsyndromic hearing loss	AD	12	3	15	Definitive
MYO7A	16	Usher syndrome type 1	AR	12	6	18	Definitive	MYO7A	16	Nonsyndromic hearing loss	AD	9.5	3.5	13	Definitive
OTOA	15	Nonsyndromic hearing loss	AR	12	2.5	14.5	Definitive
OTOF	17	Auditory neuropathy	AR	12	5.5	17.5	Definitive
OTOG	6	Nonsyndromic hearing loss	AR	12	5.5	17.5	Definitive
OTOGL	6	Nonsyndromic hearing loss	AR	12	2	14	Definitive
PAX3	10	Waardenburg syndrome	AD	12	6	18	Definitive
PCDH15	16	Usher syndrome type 1	AR	12	6	18	Definitive	PCDH15	16	Nonsyndromic hearing loss	AR	3	2	5	Limited
PDZD7	11	Nonsyndromic hearing loss	AR	12	4	16	Definitive
PJVK	16	Nonsyndromic hearing loss	AR	12	6	18	Definitive
POU3F4	14	Nonsyndromic hearing loss	X-linked	12	6	18	Definitive
POU4F3	14	Nonsyndromic hearing loss	AD	12	6	18	Definitive
PRPS1	14	PRPS1 deficiency disorder	X-linked	8.5	3.5	12	Definitive	PRPS1	14	Phosphoribosylpyrophosphate synthetase superactivity	X-linked	3.75	2	5.75	Limited
PTPRQ	11	Nonsyndromic hearing loss	AR	12	4	16	Definitive
RDX	16	Nonsyndromic hearing loss	AR	12	4	16	Definitive
SIX1	13	Branchiootorenal syndrome	AD	7.75	5.5	13.25	Definitive
SLC26A4	16	Pendred Syndrome	AR	12	6	18	Definitive
SLC52A2	2	Brown-Vialetto-Van Laere syndrome	AR	12	3	15	Definitive
SMPX	15	Nonsyndromic hearing loss	X-linked	12	2	14	Definitive
SOX10	9	Waardenburg syndrome	AD	12	5	17	Definitive
STRC	11	Nonsyndromic hearing loss	AR	12	2.5	14.5	Definitive
TECTA	16	Nonsyndromic hearing loss	AR	12	6	18	Definitive	TECTA	16	Nonsyndromic hearing loss	AD	10.5	5.5	16	Definitive
TIMM8A	11	Mohr-Tranebjaerg syndrome	X-linked	12	3	15	Definitive
TMC1	17	Nonsyndromic hearing loss	AR	12	6	18	Definitive	TMC1	17	Nonsyndromic hearing loss	AD	7.5	5	12.5	Definitive
TMIE	17	Nonsyndromic hearing loss	AR	12	6	18	Definitive
TMPRSS3	17	Nonsyndromic hearing loss	AR	12	4.5	16.5	Definitive
TPRN	16	Nonsyndromic hearing loss	AR	12	4	16	Definitive
TRIOBP	16	Nonsyndromic hearing loss	AR	12	4	16	Definitive
USH1C	16	Usher syndrome type 1	AR	12	6	18	Definitive	USH1C	16	Nonsyndromic hearing loss	AR	3	2.5	5.5	Limited
USH1G	14	Usher syndrome type 1	AR	12	6	18	Definitive
USH2A	14	Usher syndrome type 2	AR	12	6	18	Definitive
WHRN	16	Usher syndrome type 2	AR	12	6	18	Definitive	WFS1	14	Wolfram syndrome	AR	12	4	16	Definitive
WFS1	14	Neonatal-onset diabetes, congenital sensorineural deafness, and congenital cataracts	AD	11	1	12	Strong	WFS1	14	Wolfram-like syndrome	AD	10.5	0.5	11	Definitive
CABP2	6	Nonsyndromic hearing loss	AR	8	5	13	Strong
CDC14A	2	Hearing impairment and infertile male syndrome	AR	12	5	17	Strong
CISD2	4	Wolfram syndrome	AR	8.25	3	11.25	Strong
GJB3	14	Erythrokeratodermia variabilis	AD	7.5	4.5	12	Strong	GJB3	14	Nonsyndromic hearing loss	AD	1.5	1	2.5	Disputed
GRHL2	15	Nonsyndromic hearing loss	AD	7.5	4.5	12	Strong
LARS2	4	Perrault syndrome	AR	8	2.5	10.5	Strong
MYO3A	15	Nonsyndromic hearing loss	AR	6.25	5.5	11.75	Strong
S1PR2	3	Nonsyndromic hearing loss	AR	9	5.5	14.5	Strong
SLC17A8	13	Nonsyndromic hearing loss	AD	5	6	11	Strong
SLITRK6	6	Deafness and myopia	AR	9	3.5	12.5	Strong
CACNA1D	7	SA node dysfunction and deafness	AR	2	6	8	Moderate
CEACAM16	14	Nonsyndromic hearing loss	AD	6.25	3	9.25	Moderate
CLIC5	6	Nonsyndromic hearing loss	AR	2	5	7	Moderate
DIAPH3	6	Auditory neuropathy	AD	2	4.5	6.5	Moderate
DMXL2	2	Nonsyndromic hearing loss	AD	6.5	2	8.5	Moderate
EDN3	9	Waardenburg syndrome	AR	3	4.5	7.5	Moderate
EDNRB	10	Waardenburg syndrome	AR	2	4	6	Moderate
EPS8	4	Nonsyndromic hearing loss	AR	4.5	5	9.5	Moderate
EPS8L2	1	Nonsyndromic hearing loss	AR	4	2.5	6.5	Moderate
GRXCR2	3	Nonsyndromic hearing loss	AR	3	5.5	8.5	Moderate
HGF	15	Nonsyndromic hearing loss	AR	5	5	10	Moderate
HOMER2	2	Nonsyndromic hearing loss	AD	5	4.5	9.5	Moderate
KCNE1	11	Jervell and Lange-Nielsen syndrome	AR	4.5	4	8.5	Moderate
MIR96	9	Nonsyndromic hearing loss	AD	3	5.5	8.5	Moderate
MSRB3	15	Nonsyndromic hearing loss	AR	8	5.5	13.5	Moderate
MYH14	14	Nonsyndromic hearing loss	AD	8.5	2.5	11	Moderate
OSBPL2	4	Nonsyndromic hearing loss	AD	6	1	7	Moderate
P2RX2	4	Nonsyndromic hearing loss	AD	4.5	2.5	7	Moderate
RIPOR2	3	Nonsyndromic hearing loss	AR	3.5	6	9.5	Moderate
SERPINB6	14	Nonsyndromic hearing loss	AR	5.5	3.5	9	Moderate
SYNE4	4	Nonsyndromic hearing loss	AR	4	3.5	7.5	Moderate
TUBB4B	0	Leber congenital amaurosis	AD	8	0.5	8.5	Moderate
ADCY1	3	Nonsyndromic hearing loss	AR	8	2	10	Limited
BDP1	2	Nonsyndromic hearing loss	AR	2.5	0.5	3	Limited
CCDC50	15	Nonsyndromic hearing loss	AD	3	0.5	3.5	Limited
CD164	2	Nonsyndromic hearing loss	AD	4	1	5	Limited
COL4A6	4	Nonsyndromic hearing loss	X-linked	1.5	0.5	2	Limited	COL11A2	15	Nonsyndromic hearing loss	AD	8.5	0.5	9	Moderate
CRYM	13	Nonsyndromic hearing loss	AD	2.5	3	5.5	Limited	COL11A2	15	Nonsyndromic hearing loss	AR	6.3	1.5	7.8	Moderate
DCDC2	2	Nonsyndromic hearing loss	AR	4	3	7	Limited
DIABLO	10	Nonsyndromic hearing loss	AD	2	1.5	3.5	Limited
ELMOD3	2	Nonsyndromic hearing loss	AR	3	1	4	Limited
FOXI1	11	Syndromic hearing loss	AR	1	2	3	Limited	FOXI1	11	Enlarged vestibular aqueduct	AR	0.25	2.5	2.75	Disputed
HARS2	5	Perrault syndrome	AR	2.5	2	4.5	Limited
KARS	6	Nonsyndromic hearing loss	AR	2	1	3	Limited
MCM2	1	Nonsyndromic hearing loss	AD	2	1	3	Limited
MET	2	Nonsyndromic hearing loss	AR	2.5	0	2.5	Limited
NARS2	2	Nonsyndromic hearing loss	AR	3.5	0.5	4	Limited
PNPT1	2	Nonsyndromic hearing loss	AR	4	1.5	5.5	Limited
ROR1	1	Hearing loss and auditory neuropathy	AR	1	2.5	3.5	Limited
SLC26A5	14	Nonsyndromic hearing loss	AR	2	6	8	Limited
SLC44A4	0	Nonsyndromic hearing loss	AD	1.5	2	3.5	Limited
SNAI2	10	Waardenburg syndrome	AR	2	1.5	3.5	Limited
TBC1D24	4	Nonsyndromic hearing loss	AD	4	1	5	Limited
TJP2	12	Nonsyndromic hearing loss	AD	2.5	2	4.5	Limited
TMEM132E	2	Nonsyndromic hearing loss	AR	0.25	3.5	3.75	Limited
TNC	4	Nonsyndromic hearing loss	AD	3.5	1.5	5	Limited
